# Supplementary material for: Asymmetrical electrode system for stable operation of a large-scale reverse electrodialysis (RED) system
Source: Royal Society of Chemistry journal article supplement (doi:10.1039/d0ew00001a), 2020-01-01
Supplement: d0ew00001a1.pdf [file d0ew00001a1.pdf]

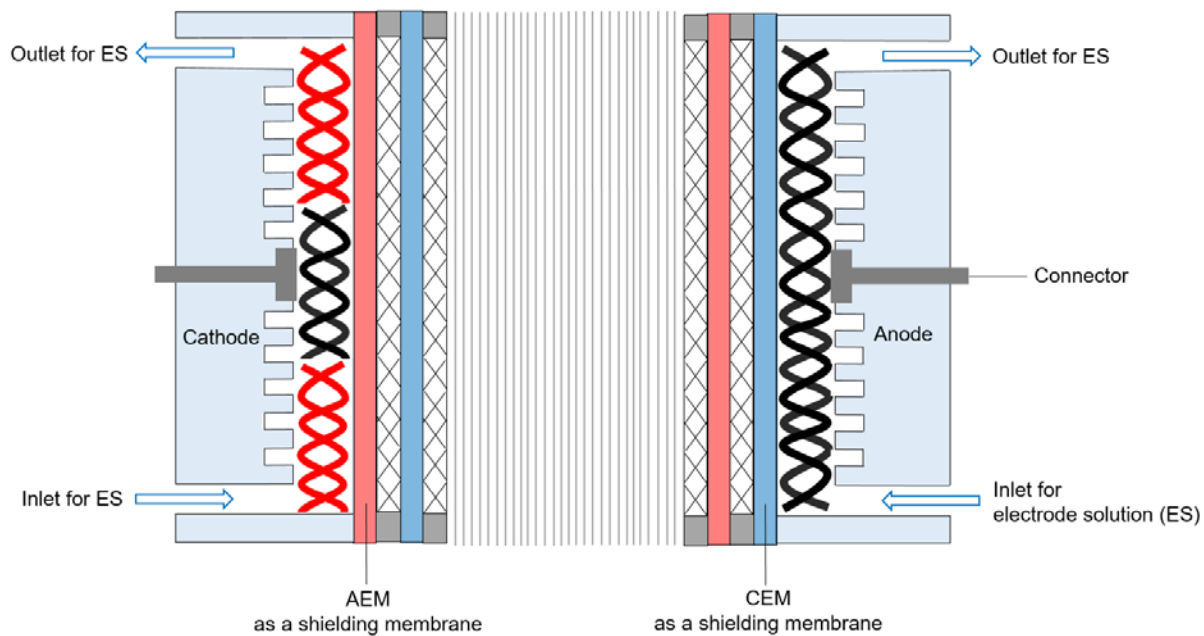

19

20 **Fig. S1.** Stack configuration of the large-scale RED stack used for experiments. Black and red  
 21 meshes are Pt-coated Ti mesh, and polymer-coated Ti mesh, respectively.

22

23

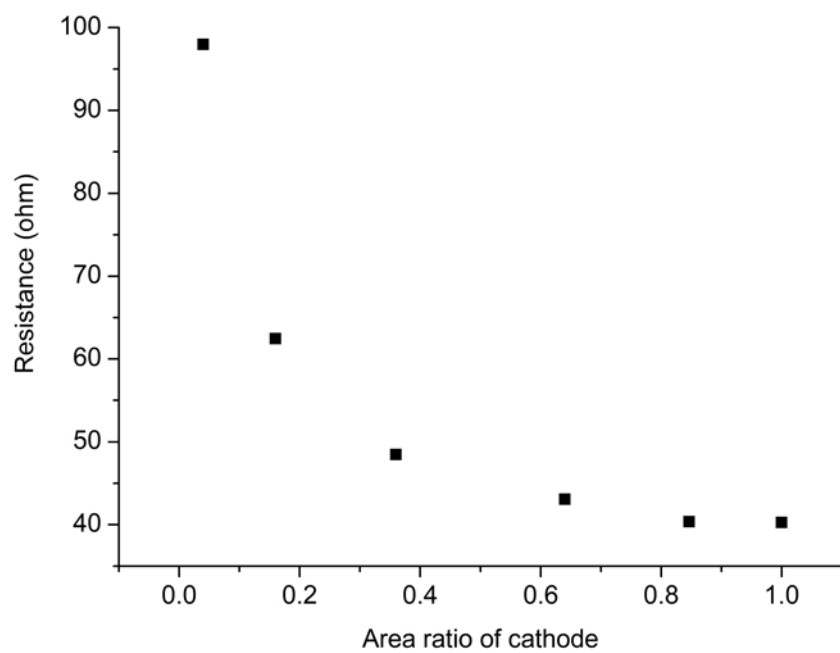

24

25 **Fig. S2.** Internal resistances with varied area ratios of cathode in the lab-scale RED stack with  
26 100 cell pairs.

27

28

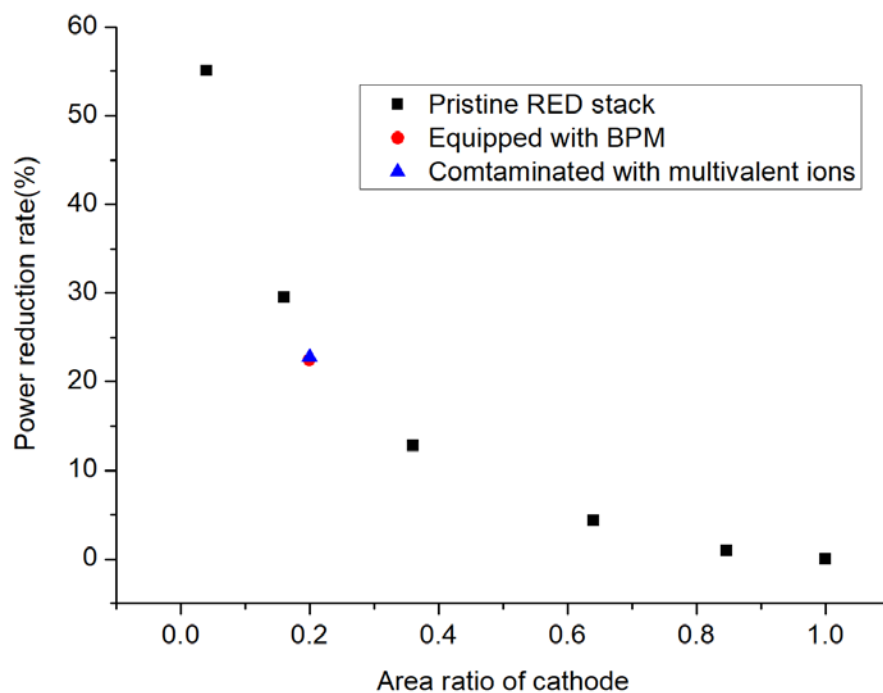

29

30 **Fig. S3.** Power-reduction rates of the lab-scale RED stacks contaminated with multivalent ions  
 31 (blue triangle) or those equipped with a bipolar membrane (BPM, Fumatech BWT GmbH,  
 32 Germany) as the shielding membrane (red circle). The other data (black squares) are the same  
 33 as that in Figure 1d.

34

35

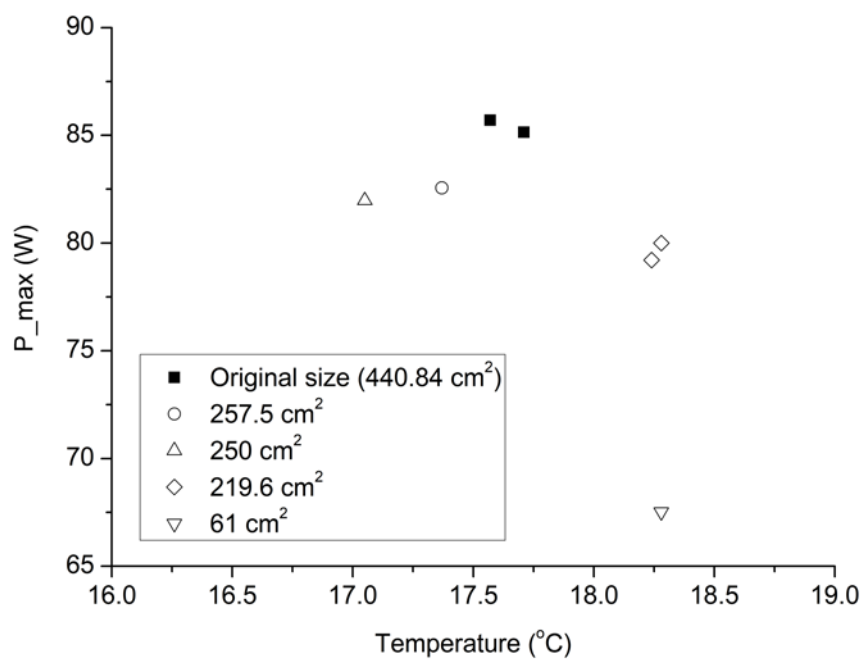

36

37 **Fig. S4.**  $P_{max}$  of the large-scale RED stack with 1,000 cell pairs as a function of temperature  
 38 of the feed solutions.

39

40

41

42

43

44

45

46

47

48 **Calculation of permselectivity ( $\alpha$ )**

49 The anion transport number ( $t_-^m$ ) in the membrane phase (AEM), was calculated from the  
50 measured membrane potential ( $E_m$ ).

51 
$$t_-^m = \frac{\left[ E_m / \left( \frac{RT}{F} \ln \frac{a_1}{a_2} \right) \right]}{2} + 1$$

52 where  $R$  is the gas constant (8.314 J/(mol K)),  $F$  is the Faraday constant (96490 C/mol),  $T$  is  
53 the absolute temperature (K), and  $a_1$  and  $a_2$  are the activities of the concentrated and the  
54 diluted NaCl solutions (mol/L), respectively.

55 The  $\alpha$  can be defined in terms of transport numbers (Strathmann 2011).

56 
$$\alpha = \frac{t_-^m - t_-^s}{t_+^s}$$

57 where  $m$  refers to the membrane phase and  $s$  refers to the solution phase,  $t_+^s$  refers to cation  
58 transport number in the solution phase, and  $t_-^s$  refers to the anion transport number in the  
59 solution phase.

60

61

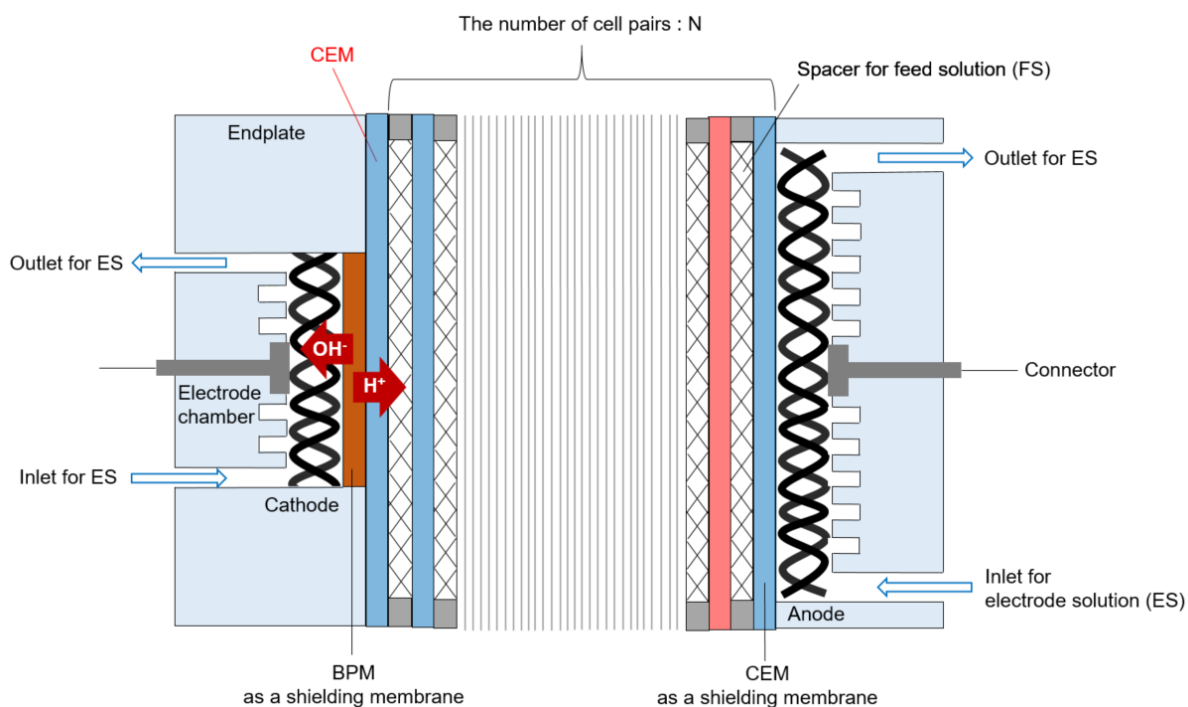

62

63 **Fig. S5.** Schematic of asymmetrical electrode system with bipolar membrane (BPM) for  
 64 suppressing inorganic scaling around the cathode in a large-scale RED system. To prevent  
 65 leakage between the BPM and the corresponding spacer, the CEM can be additionally inserted  
 66 next to the BPM, and it served the purpose for both acting as a physical barrier for bulk fluid,  
 67 and also as the ion-selective layer for protons and cations.

68

69

70 Strathmann, H. (2011) Introduction to membrane science and technology, Wiley-VCH, Weinheim.

71
